# Supplementary material for: Sandwich-Type DNA Micro-Optode Based on Gold–Latex Spheres Label for Reflectance Dengue Virus Detection
Source: PubMed Central journal article supplement (PMC7180460; doi:10.3390/s20071820), 2020-03-25
Supplement: sensors-20-01820-s001.pdf [file sensors-20-01820-s001.pdf]

## Supplementary Material

**Figure 1.** The FESEM micrographs of (a) poly(*n*BA-NAS) and (b) PSA latex microspheres captured by Zeiss Merlin field-emission scanning electron microscope operating at 15 kV; (c) PSA microparticles decorated with AuNPs; (d) the FTIR spectra of i) poly(*n*BA-NAS) and ii) PSA copolymer microspheres acquired by Agilent Cary 630 FTIR spectrometer from 500-4000  $\text{cm}^{-1}$ ; (e) the UV-Vis absorption spectrum and (f) TEM image of colloid AuNPs synthesized by citrate reduction method.

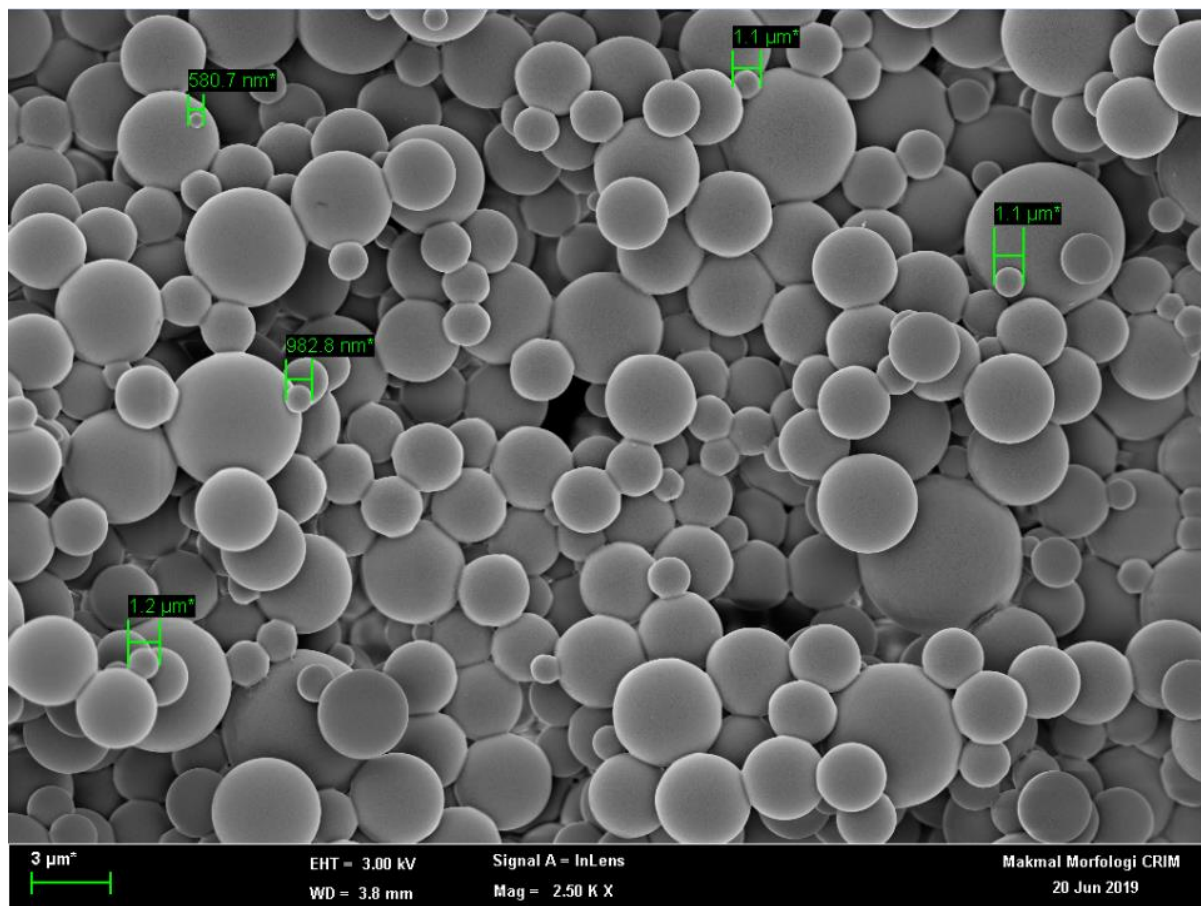

(a)

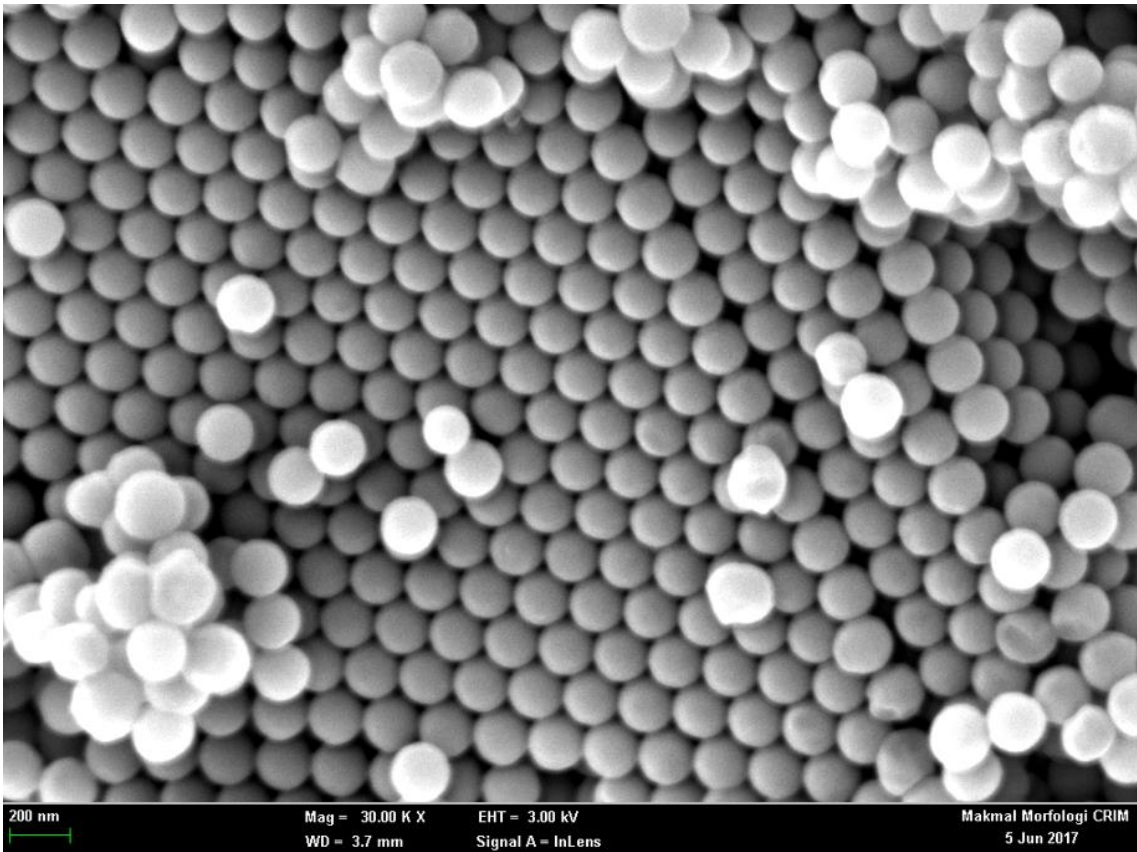

(b)

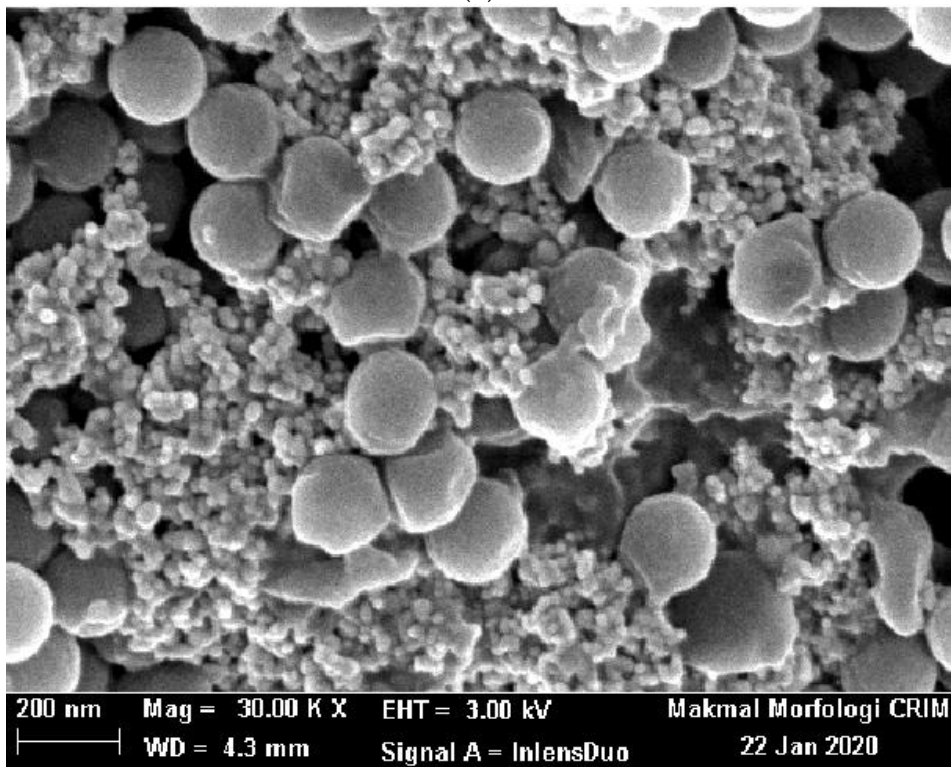

(c)

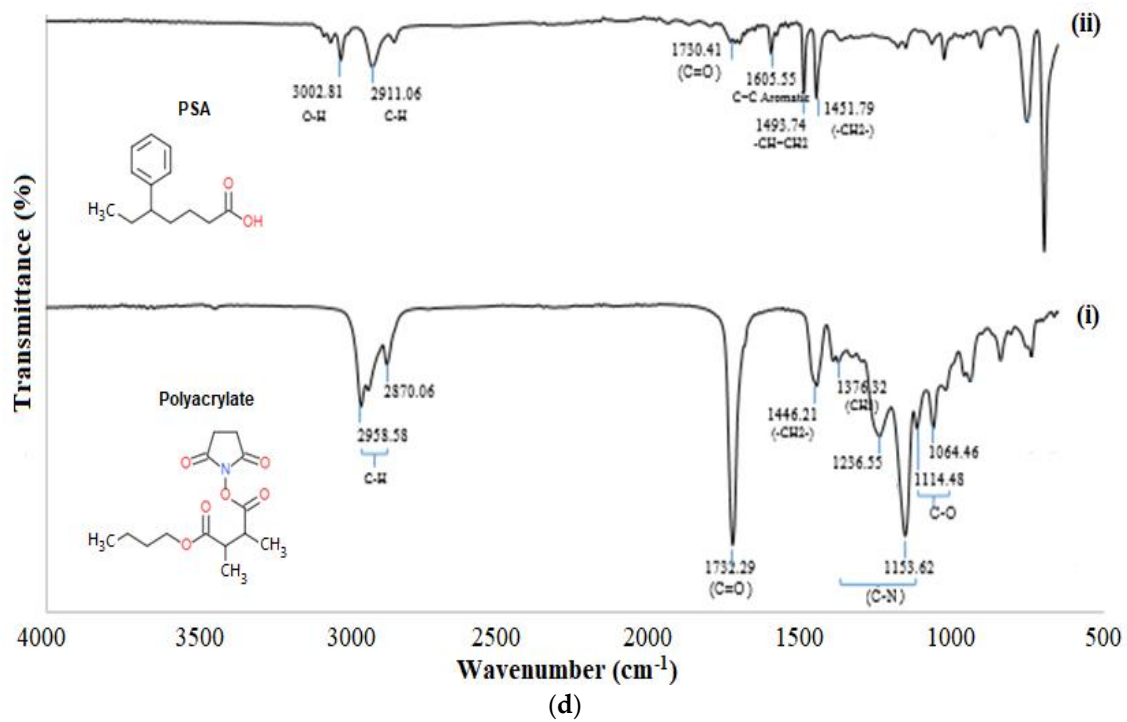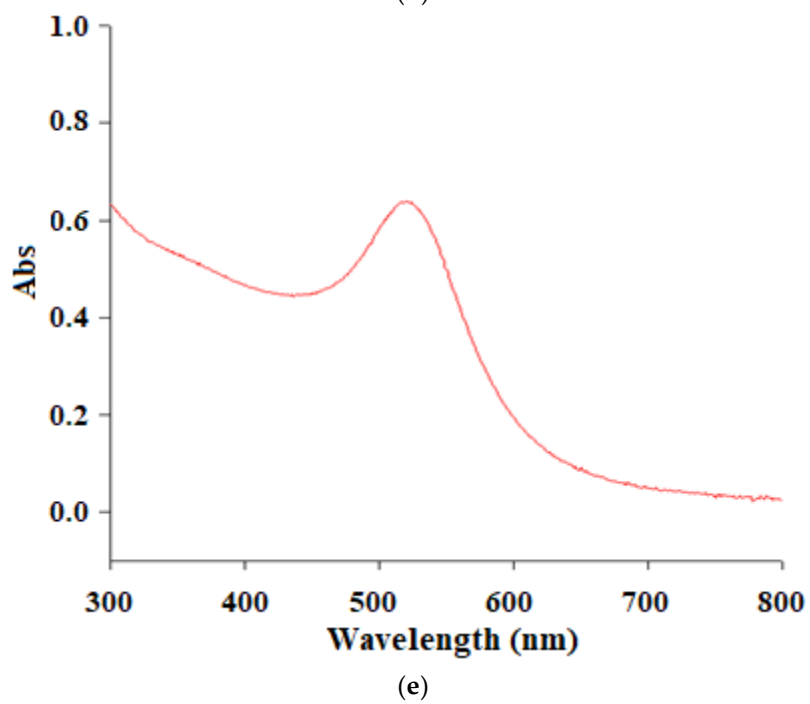

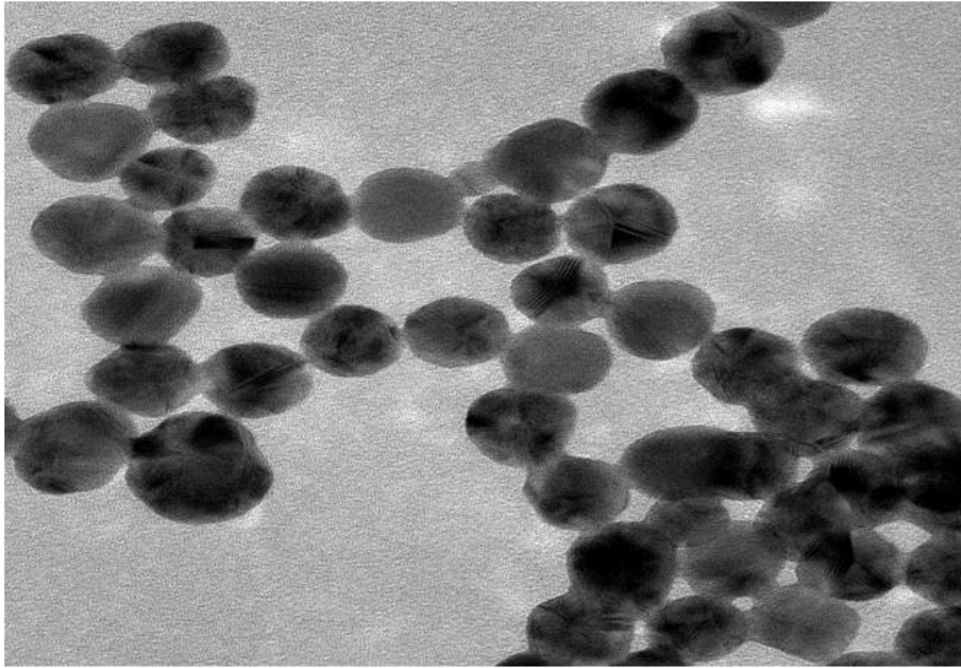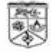

Au col-c

kV = 100

Mag = 310 K X

20 nm

(f)

**Figure S2** PCR electrophoretic results for dengue virus serotype 2 detection in blood, urine and saliva samples collected from patient 1 (a), patient 2 (b), patient 3 (c) and healthy volunteer (d and e). The lane numbers indicate patients' sample codes. Positive control of amplification was included and denoted as 'C'. Amplicon size: 69 bp (dengue virus serotype 2) and 50 bp ( $\beta$ -actin). DNA ladder used: O'Range Ruler 20 bp. PCR products were detected on 4% Agarose in TBE buffer at 90 V for 60 min.

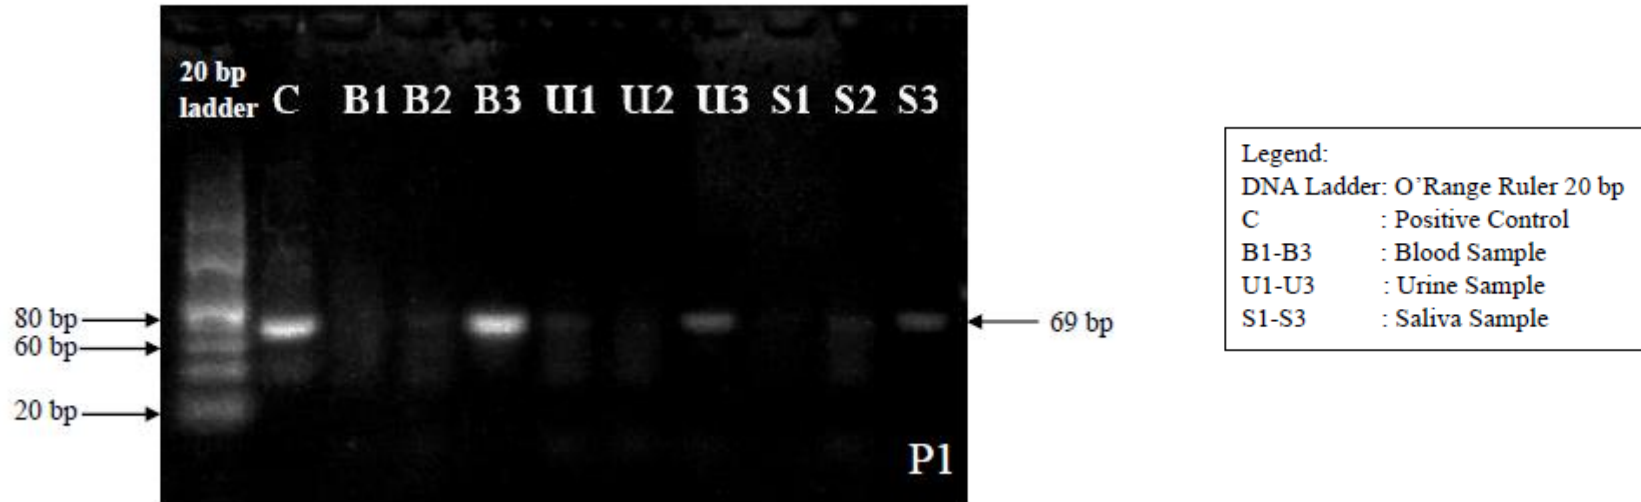

(a)

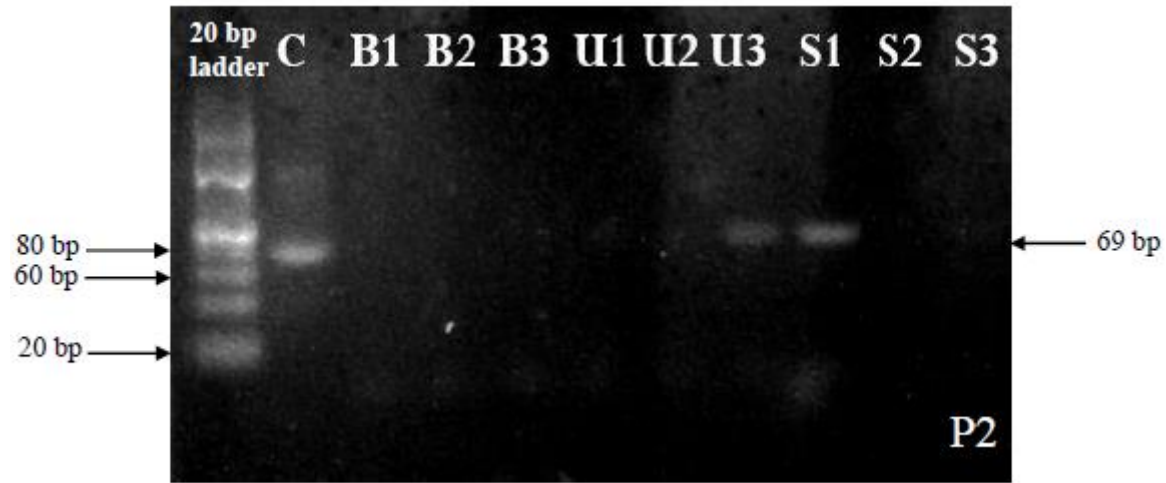

Legend:  
 DNA Ladder: O'Range Ruler 20 bp  
 C : Positive Control  
 B1-B3 : Blood Sample  
 U1-U3 : Urine Sample  
 S1-S3 : Saliva Sample

(b)

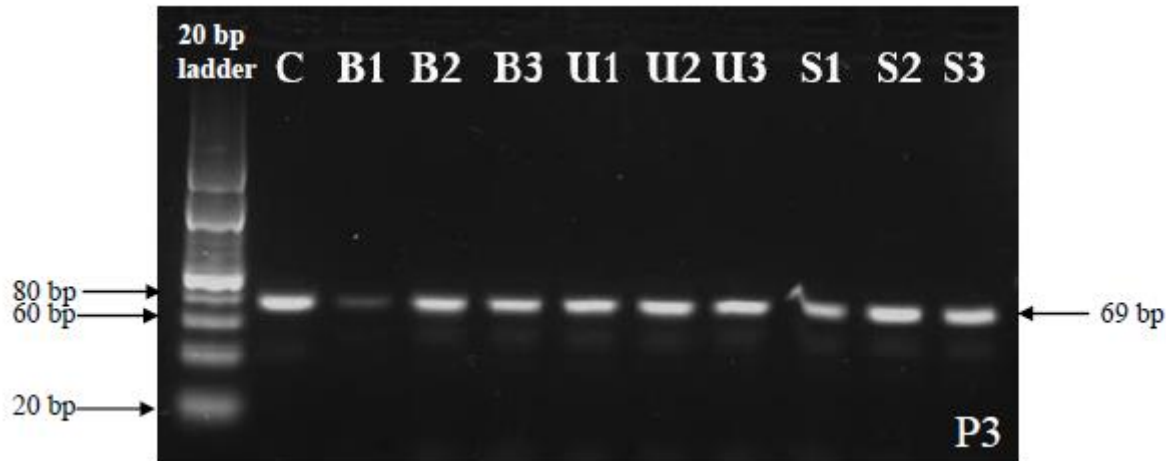

Legend:  
 DNA Ladder: O'Range Ruler 20 bp  
 C : Positive Control  
 B1-B3 : Blood Sample  
 U1-U3 : Urine Sample  
 S1-S3 : Saliva Sample

(c)

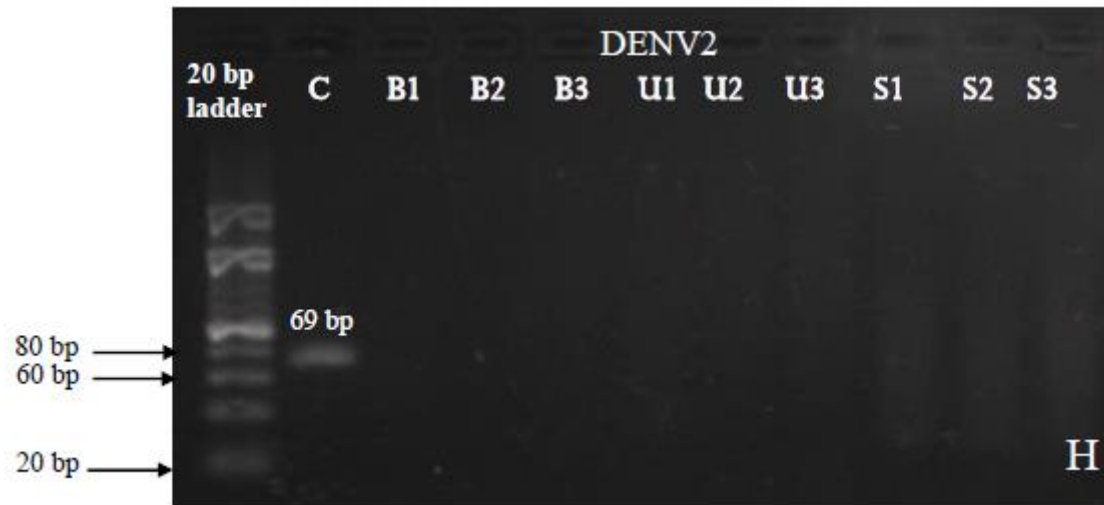

(d)

Legend:  
 DNA Ladder: O'Range Ruler 20 bp  
 C : Positive Control  
 B1-B3 : Blood Sample  
 U1-U3 : Urine Sample  
 S1-S3 : Saliva Sample

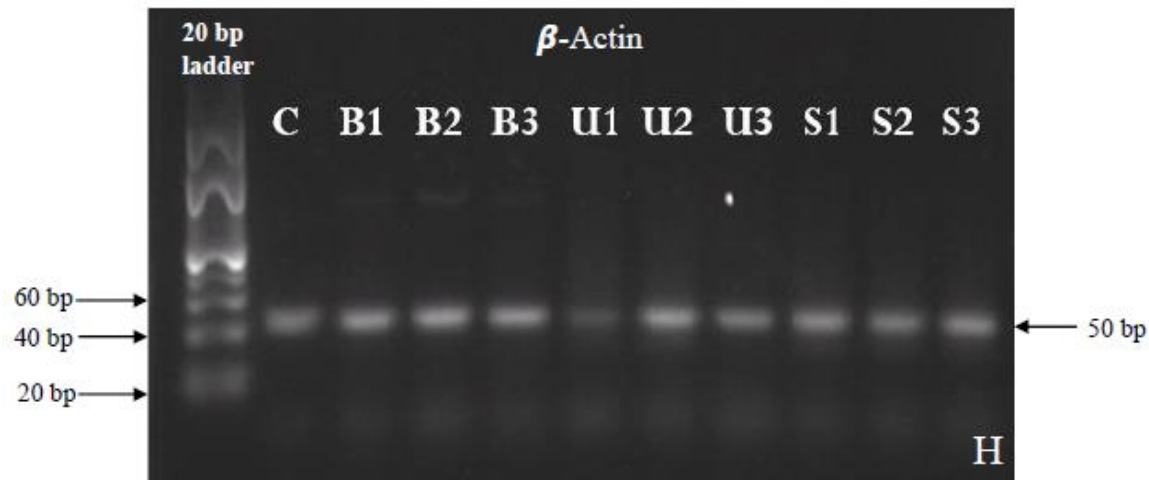

(e)

Legend:  
 DNA Ladder: O'Range Ruler 20 bp  
 C : Positive Control  
 B1-B3 : Blood Sample  
 U1-U3 : Urine Sample  
 S1-S3 : Saliva Sample

**Table 1.** The RNA concentrations extracted from blood (B), urine (U) and saliva (S) samples of patient 1 (P1), patient 2 (P2), patient 3 (P3) and healthy volunteer (H) based on A260/280 and A260/230 absorbance ratios by using NanoDrop spectrophotometer. The right column shows the volume of RNA used in cDNA synthesis step. The results are presented as mean (n = 3).

| <b>Sample ID</b> | <b>RNA concentration (ng/<math>\mu</math>L)</b> | <b>A260/280</b> | <b>A260/230</b> | <b>Volume for 100 ng RNA (<math>\mu</math>L)</b> |
|------------------|-------------------------------------------------|-----------------|-----------------|--------------------------------------------------|
| P1B1             | 43.6                                            | 1.38            | 0.17            | 2.29                                             |
| P1B2             | 22.6                                            | 1.70            | 0.06            | 4.42                                             |
| P1B3             | 39.0                                            | 1.56            | 0.30            | 2.56                                             |
| P1U1             | 44.4                                            | 1.49            | 0.30            | 2.25                                             |
| P1U2             | 49.8                                            | 1.58            | 0.37            | 2.01                                             |
| P1U3             | 60.6                                            | 1.46            | 0.46            | 1.65                                             |
| P1S1             | 40.8                                            | 1.62            | 0.20            | 2.45                                             |
| P1S2             | 40.7                                            | 1.51            | 0.30            | 2.46                                             |
| P1S3             | 41.8                                            | 1.73            | 0.29            | 2.39                                             |
| P2B1             | 5.5                                             | 1.56            | 0.04            | 18.18                                            |
| P2B2             | 6.0                                             | 1.55            | 0.05            | 16.67                                            |
| P2B3             | 5.7                                             | 1.78            | 0.04            | 17.54                                            |
| P2U1             | 5.2                                             | 1.72            | 0.04            | 19.23                                            |
| P2U2             | 5.9                                             | 1.38            | 0.03            | 16.95                                            |
| P2U3             | 5.5                                             | 1.85            | 0.04            | 18.18                                            |
| P2S1             | 6.0                                             | 1.74            | 0.05            | 16.67                                            |
| P2S2             | 5.9                                             | 1.11            | 0.03            | 16.95                                            |
| P2S3             | 4.9                                             | 1.21            | 0.04            | 20.41                                            |
| P3B1             | 5.5                                             | 1.56            | 0.04            | 18.18                                            |
| P3B2             | 5.7                                             | 1.55            | 0.03            | 17.54                                            |
| P3B3             | 5.5                                             | 1.68            | 0.03            | 18.18                                            |
| P3U1             | 5.9                                             | 2.01            | 0.05            | 16.95                                            |
| P3U2             | 4.9                                             | 1.11            | 0.04            | 20.41                                            |
| P3U3             | 5.2                                             | 1.68            | 0.03            | 19.23                                            |
| P3S1             | 6.1                                             | 1.88            | 0.03            | 16.39                                            |
| P3S2             | 5.6                                             | 2.09            | 0.04            | 17.86                                            |
| P3S3             | 6.2                                             | 1.89            | 0.04            | 16.13                                            |
| HB1              | 10.0                                            | 2.57            | 0.03            | 10.00                                            |
| HB2              | 6.4                                             | 1.17            | 0.02            | 15.63                                            |
| HB3              | 10.3                                            | 1.87            | 0.03            | 9.71                                             |
| HU1              | 48.8                                            | 1.68            | 0.27            | 2.05                                             |
| HU2              | 43.0                                            | 2.60            | 0.31            | 2.33                                             |
| HU3              | 12.8                                            | 1.69            | 0.09            | 7.81                                             |
| HS1              | 33.2                                            | 1.66            | 0.25            | 3.01                                             |
| HS2              | 40.1                                            | 1.78            | 0.23            | 2.49                                             |
| HS3              | 47.7                                            | 1.74            | 0.19            | 2.10                                             |
